# Supplementary material for: Looking Back and Looking Around: How Athletes, Parents and Coaches See Psychosocial Development in Adolescent Performance Sport
Source: MDPI journal article supplement (doi:10.3390/sports10040047), 2022-03-22
Supplement: s1 [file s1]

**Table S1a.** Demographic data of coaches.

| <b>Coach<br/>pseudonym</b> | <b>Age</b> | <b>Years<br/>coaching</b> | <b>Years at<br/>club</b> | <b>Former club<br/>player?</b> | <b>Current<br/>profession (or<br/>former if<br/>retired)</b> | <b>Socioeconomic<br/>status and<br/>ethnic origin</b> |
|----------------------------|------------|---------------------------|--------------------------|--------------------------------|--------------------------------------------------------------|-------------------------------------------------------|
| Jack                       | 72         | 45                        | 17                       | N/A Club co-founder            | High school teacher                                          | Retired middle class Professional White British       |
| George                     | 72         | 43                        | 17                       | N/A Club co-founder            | High school deputy head teacher                              | Retired middle class Professional White British       |
| James                      | 35         | 10                        | 10                       | Yes                            | College teacher                                              | Middle class Professional White British               |
| Michael                    | 26         | 6                         | 4                        | No                             | Sport development officer                                    | Working Class Semi-professional White British         |
| Carl                       | 30         | 8                         | 8                        | Yes                            | Full time club coach                                         | Working Class Semi-professional White British         |

**Table S1b.** Demographic data of former parents.

| Former parent pseudonym                   | Age       | No of children at club | Years at the club | Years children out of the club | Level children played at              | Socioeconomic status; ethnic origin; marital status                                                             |
|-------------------------------------------|-----------|------------------------|-------------------|--------------------------------|---------------------------------------|-----------------------------------------------------------------------------------------------------------------|
| Philippa and Jerry (interviewed together) | 57 and 58 | 3                      | 12                | 7                              | Junior and Senior National League     | Upper middle class<br>Professional<br>White<br>British/American<br>Married                                      |
| Albert                                    | 58        | 2                      | 10                | 4                              | Junior and Senior National League     | Upper middle class<br>Professional<br>White British<br>Married                                                  |
| Damian                                    | 57        | 1                      | 6                 | 13                             | Junior and Senior National League     | Lower middle class<br>Semi-professional<br>Black Caribbean<br>Married                                           |
| Mark                                      | 57        | 1                      | 5                 | 7                              | Top End Community League <sup>1</sup> | Upper middle class<br>Professional<br>White British<br>Married                                                  |
| Patrick                                   | 58        | 2                      | 12                | 7                              | Junior and Senior National League     | Upper middle class<br>Professional<br>White British<br>Married                                                  |
| Neil                                      | 59        | 2                      | 5                 | 11                             | Junior and Senior National League     | Semi-skilled Working class<br>Manual worker<br>White British<br>Married                                         |
| Eva                                       | 62        | 1                      | 7                 | 6                              | Junior and Senior National League     | Semi-skilled Working class<br>Manual worker<br>Black Caribbean<br>Married (but husband still lives in Barbados) |
| Sandra                                    | 56        | 2                      | 12                | 7                              | Junior and Senior National League     | Semi-skilled Working class<br>Manual worker<br>White British<br>Divorced                                        |

<sup>1</sup> Mark and his son Sid were chosen because, despite not reaching national league, Sid spent a high amount of time at the club. His experience as a 'near-miss' non-national league player was deemed valuable for the study.

**Table S1c.** Demographic data of former players.

| Former player pseudonym | Age | Years at the club | Years out of the club | Level played at                                                         | Socioeconomic status; ethnic origin; marital status                                                                         |
|-------------------------|-----|-------------------|-----------------------|-------------------------------------------------------------------------|-----------------------------------------------------------------------------------------------------------------------------|
| Charlie                 | 31  | 8                 | 9                     | Junior and Senior National League<br>USA College<br>UK Pro League       | Upper middle class<br>Professional<br>White British/American<br>Single                                                      |
| Darren                  | 32  | 6                 | 7                     | Junior and Senior National League<br>UK Semi-Pro League                 | Lower middle class<br>Professional<br>White British<br>Single (in long term relationship)<br>(currently lives in China)     |
| Jacob                   | 32  | 8                 | 9                     | Junior and Senior National League<br>USA College<br>UK Semi-Pro League  | Upper middle class<br>Professional<br>White British<br>Married                                                              |
| Anthony                 | 32  | 3                 | 9                     | Junior and Senior National League<br>USA College<br>Europe Pro League   | Upper middle class<br>Professional<br>Black African<br>Married<br>(currently lives in the USA)                              |
| Sid                     | 27  | 5                 | 7                     | Top End Community League<br>UK University League                        | Upper middle class<br>Professional<br>White British<br>Single                                                               |
| Steve                   | 31  | 7                 | 6                     | Junior and Senior National League<br>Europe Pro-League<br>UK Pro-League | Lower middle class<br>Professional<br>Black Caribbean<br>Single (in long term relationship)<br>Has a daughter (6 years old) |

**Table S1d.** Demographic data of current parents.

| Current parent pseudonym | Age | No of children at club | Years at the club | Involvement at club beyond parenting                   | Socioeconomic status; ethnic origin; marital status                                       |
|--------------------------|-----|------------------------|-------------------|--------------------------------------------------------|-------------------------------------------------------------------------------------------|
| Jerome                   | 48  | 3                      | 5                 | Team manager<br>Mini-bus driver                        | Upper middle class<br>Professional<br>White British<br>Married                            |
| Thomas                   | 49  | 1                      | 4                 | None                                                   | Semi-skilled Working class<br>Manual worker<br>White British<br>Married                   |
| Will                     | 46  | 1                      | 5                 | None                                                   | Upper middle class<br>Professional<br>Black Caribbean<br>Married                          |
| Sam                      | 45  | 1                      | 3                 | Table official                                         | Lower middle class<br>Semi-professional<br>White British<br>Married                       |
| James                    | 48  | 2                      | 4                 | Table official                                         | Semi-skilled Working class<br>Manual worker<br>White British<br>Married                   |
| Emily                    | 47  | 3                      | 7                 | Team Manager<br>Table official                         | Upper middle class<br>Semi-professional<br>White British<br>Married                       |
| Chloe<br>(Transgender)   | 45  | 1                      | 3                 | None                                                   | Upper middle class<br>Professional<br>White British<br>Single (in long term relationship) |
| Megan                    | 50  | 2                      | 10                | Team manager<br>Table official<br>General volunteering | Skilled Working class<br>Manual worker<br>White British<br>Divorced                       |
| Jessica                  | 42  | 1                      | 5                 | None                                                   | Lower middle class<br>Semi-professional<br>Black African<br>Married                       |
| Sophie                   | 45  | 1                      | 4                 | Team manager                                           | Upper middle class<br>Professional<br>White British<br>Married                            |

**Table S1e.** Demographic data of current players.

| <b>Current player pseudonym</b> | <b>Age</b> | <b>Years at the club</b> | <b>Playing history</b>                                                                | <b>Socioeconomic status; ethnic origin;</b>                 |
|---------------------------------|------------|--------------------------|---------------------------------------------------------------------------------------|-------------------------------------------------------------|
| Harry                           | 12         | 2                        | Played community basketball elsewhere<br>Joined national league programme 2 years ago | Upper middle class<br>White British                         |
| Oliver                          | 13         | 1                        | Played community basketball elsewhere<br>Joined national league programme 1 years ago | Lower middle class<br>White British                         |
| Alfie                           | 12         | 3                        | Came through club community programme<br>Selected to national league 3 years ago      | Upper middle class<br>Mixed race White<br>British/Caribbean |
| Jamie                           | 13         | 3                        | Came through club community programme<br>Selected to national league 3 years ago      | Working class<br>White British                              |
| Tabo                            | 12         | 2                        | Played community basketball elsewhere<br>Joined national league programme 2 years ago | Working class<br>Black African                              |
| Ethan                           | 15         | 4                        | Played community basketball elsewhere<br>Joined national league programme 4 years ago | Lower middle class<br>Mixed race White<br>British/Caribbean |
| Noah                            | 16         | 3                        | Played community basketball elsewhere<br>Joined national league programme 3 years ago | Upper middle class<br>White British                         |
| Mikael                          | 15         | 2                        | Migrated from another country<br>Joined national league programme 2 years ago         | Working class<br>Black African                              |
| Liam                            | 16         | 4                        | Came through club community programme<br>Selected to national league 4 years ago      | Working class<br>White British                              |
| Jayden                          | 15         | 5                        | Came through club community programme<br>Selected to national league 5 years ago      | Upper middle class<br>White British                         |
